# Supplementary material
Source: Frontiers journal article supplement (https://www.frontiersin.org/articles/127203)
Supplement: Data_Sheet_1.XLSX [file Data_Sheet_1.XLSX]

## Sheet: antioxidative_genes_grapevine
Exhaustive list of isoforms of the major antioxidative response genes in grapevine.
1. SODCP
Cu/Zn superoxide dismutase-like[Vitis vinifera]
Other Aliases: CSD2
Other Designations: chloroplast copper-zinc superoxide dismutase; putative Cu/Zn superoxide dismutase; superoxide dismutase [Cu-Zn], chloroplastic
Chromosome: 6
Annotation: Chromosome 6NC_012012.3 (18276941..18280918)
ID: 100233100
2. MNSOD
manganese superoxide dismutase[Vitis vinifera]
Other Aliases: GSVIVT00029451001
Chromosome: 13
Annotation: Chromosome 13NC_012019.3 (1602977..1606840)
ID: 100233137
3. LOC100260705
superoxide dismutase [Cu-Zn] 2-like[Vitis vinifera]
Other Aliases: GSVIVT01033413001
Chromosome: 8
Annotation: Chromosome 8NC_012014.3 (20888645..20892129)
ID: 100260705
4. LOC100241809
superoxide dismutase [Cu-Zn]-like[Vitis vinifera]
Other Aliases: GSVIVT01021959001
Chromosome: 14
Annotation: Chromosome 14NC_012020.3 (5076419..5081022)
ID: 100241809
5. LOC100265553
superoxide dismutase [Cu-Zn]-like[Vitis vinifera]
Chromosome: 14
Annotation: Chromosome 14NC_012020.3 (5248962..5251726)
ID: 100265553
6. LOC100247035
superoxide dismutase [Cu-Zn]-like[Vitis vinifera]
Chromosome: 14
Annotation: Chromosome 14NC_012020.3 (5536795..5537975)
ID: 100247035
7. LOC100245987
superoxide dismutase [Cu-Zn]-like[Vitis vinifera]
Chromosome: 14
Annotation: Chromosome 14NC_012020.3 (12382543..12390497, complement)
ID: 100245987
8. LOC100263358
copper chaperone for superoxide dismutase-like[Vitis vinifera]
Chromosome: 2
Annotation: Chromosome 2NC_012008.3 (4357335..4364356)
ID: 100263358
9. LOC100263457
superoxide dismutase [Fe], chloroplastic-like[Vitis vinifera]
Other Aliases: GSVIVT00007083001
Chromosome: 10
Annotation: Chromosome 10NC_012016.3 (12756606..12763459, complement)
ID: 100263457
10. LOC100258067
superoxide dismutase [Fe], chloroplastic-like[Vitis vinifera]
Other Aliases: GSVIVT01013850001
Chromosome: 16
Annotation: Chromosome 16NC_012022.3 (5200385..5206034)
ID: 100258067
11. LOC100258671
superoxide dismutase [Mn], mitochondrial-like[Vitis vinifera]
Chromosome: 6
Annotation: Chromosome 6NC_012012.3 (8686648..8687990, complement)
ID: 100258671
12. APX
cytosolic ascorbate peroxidase[Vitis vinifera]
Chromosome: 8
Annotation: Chromosome 8NC_012014.3 (14111227..14111692, complement)
ID: 100233048
13. LOC100254009
L-ascorbate peroxidase T, chloroplastic-like[Vitis vinifera]
Chromosome: 18
Annotation: Chromosome 18NC_012024.3 (2761103..2772558)
ID: 100254009
14. LOC100246866
L-ascorbate peroxidase 3, peroxisomal-like[Vitis vinifera]
Other Aliases: GSVIVT00036111001
Chromosome: 3
Annotation: Chromosome 3NC_012009.3 (1587481..1594328, complement)
ID: 100246866
15. LOC100262705
probable L-ascorbate peroxidase 3-like[Vitis vinifera]
Chromosome: 4
Annotation: Chromosome 4NC_012010.3 (20262984..20272414, complement)
ID: 100262705
16. LOC100233013
ascorbate peroxidase[Vitis vinifera]
Other Aliases: GSVIVT01025104001
Chromosome: 6
Annotation: Chromosome 6NC_012012.3 (4441310..4446777, complement)
ID: 100233013
17. LOC100247405
L-ascorbate peroxidase-like[Vitis vinifera]
Other Aliases: GSVIVT01035858001
Chromosome: 4
Annotation: Chromosome 4NC_012010.3 (4942085..4950521, complement)
ID: 100247405
18. GCAT
catalase[Vitis vinifera]
Chromosome: Un
ID: 100232861
19. LOC100244516
catalase isozyme 1-like[Vitis vinifera]
Other Aliases: GSVIVT01013367001
Chromosome: 18
Annotation: Chromosome 18NC_012024.3 (927315..932872, complement)
ID: 100244516
20. LOC100853165
catalase isozyme 1-like[Vitis vinifera]
Chromosome: 4
Annotation: Chromosome 4NC_012010.3 (20659992..20665841)
ID: 100853165
22. LOC100233035
monodehydroascorbate reductase[Vitis vinifera]
Other Aliases: GSVIVT00021644001
Chromosome: 8
Annotation: Chromosome 8NC_012014.3 (17556027..17564025)
ID: 100233035
23. LOC100267896
probable monodehydroascorbate reductase, cytoplasmic isoform 2-like[Vitis vinifera]
Other Aliases: GSVIVT00020720001
Chromosome: 14
Annotation: Chromosome 14NC_012020.3 (27565315..27571838, complement)
ID: 100267896
24. LOC100264066
bifunctional monodehydroascorbate reductase and carbonic anhydrase nectarin-3-like[Vitis vinifera]
Other Aliases: GSVIVT00000607001
Chromosome: 8
Annotation: Chromosome 8NC_012014.3 (18771817..18775120, complement)
ID: 100264066
25. LOC100253570
monodehydroascorbate reductase, chloroplastic-like[Vitis vinifera]
Other Aliases: GSVIVT00002544001
Chromosome: 2
Annotation: Chromosome 2NC_012008.3 (450050..457359)
ID: 100253570
26. LOC100259742
bifunctional monodehydroascorbate reductase and carbonic anhydrase nectarin-3-like[Vitis vinifera]
Chromosome: 8
Annotation: Chromosome 8NC_012014.3 (17237390..17239765, complement)
ID: 100259742
27. LOC100262418
bifunctional monodehydroascorbate reductase and carbonic anhydrase nectarin-3-like[Vitis vinifera]
Other Aliases: GSVIVT01005048001
Chromosome: Un
ID: 100262418
28. LOC100243331
bifunctional monodehydroascorbate reductase and carbonic anhydrase nectarin-3-like[Vitis vinifera]
Other Aliases: VIT_00025217001
Chromosome: 6
Annotation: Chromosome 6NC_012012.3 (3142691..3144527)
ID: 100243331
29. LOC100267571
bifunctional monodehydroascorbate reductase and carbonic anhydrase nectarin-3-like[Vitis vinifera]
Chromosome: Un
ID: 100267571
30. DHAR
dehydroascorbate reductase[Vitis vinifera]
Other Aliases: GSVIVT00029528001
Chromosome: 13
ID: 100233050
31. LOC100258402
glutathione S-transferase DHAR3, chloroplastic-like[Vitis vinifera]
Other Aliases: GSVIVT00032988001
Chromosome: 14
Annotation: Chromosome 14NC_012020.3 (14714661..14767459, complement)
ID: 100258402
32. GOR
glutathione reductase (NADPH)[Vitis vinifera]
Other Aliases: GSVIVT01000729001
Chromosome: 7
Annotation: Chromosome 7NC_012013.3 (228895..236286, complement)
ID: 100232842
33. LOC100254507
glutathione reductase, cytosolic-like[Vitis vinifera]
Other Aliases: GSVIVT00020491001
Chromosome: 5
Annotation: Chromosome 5NC_012011.3 (12014586..12073421, complement)
ID: 100254507
34. GST4
glutathione S-transferase[Vitis vinifera]
Other Aliases: GSVIVT00023496001
Chromosome: 4
Annotation: Chromosome 4NC_012010.3 (11504960..11507319, complement)
ID: 100232976
35. GST1
glutathione S-transferase[Vitis vinifera]
Other Aliases: GSVIVT00006661001
Chromosome: 19
Annotation: Chromosome 19NC_012025.3 (16915103..16916114, complement)
ID: 100232915
36. GST3
glutathione S-transferase 3[Vitis vinifera]
Other Aliases: GSVIVT00018861001
Chromosome: 12
Annotation: Chromosome 12NC_012018.3 (1434302..1435749, complement)
ID: 100233042
37. LOC100242138
glutathione S-transferase TCHQD-like[Vitis vinifera]
Other Aliases: GSVIVT00015454001
Chromosome: 18
Annotation: Chromosome 18NC_012024.3 (2255033..2258145)
ID: 100242138
38. LOC100261799
probable glutathione S-transferase parC-like[Vitis vinifera]
Other Aliases: GSVIVT00012187001
Chromosome: 19
Annotation: Chromosome 19NC_012025.3 (13089558..13090888, complement)
ID: 100261799
39. LOC100259478
probable glutathione S-transferase-like[Vitis vinifera]
Other Aliases: GSVIVT00009041001
Chromosome: Un
ID: 100259478
40. LOC100252749
glutathione S-transferase-like[Vitis vinifera]
Other Aliases: GSVIVT00023538001
Chromosome: 7
Annotation: Chromosome 7NC_012013.3 (2805698..2819066)
ID: 100252749
41. LOC100251970
glutathione S-transferase U7-like[Vitis vinifera]
Other Aliases: GSVIVT00024208001
Chromosome: 6
Annotation: Chromosome 6NC_012012.3 (6486966..6488211)
ID: 100251970
42. LOC100247406
probable glutathione S-transferase-like[Vitis vinifera]
Other Aliases: GSVIVT00006652001
Chromosome: 19
Annotation: Chromosome 19NC_012025.3 (16766872..16777158)
ID: 100247406
43. LOC100246597
glutathione S-transferase L3-like[Vitis vinifera]
Other Aliases: GSVIVT01025566001
Chromosome: 8
Annotation: Chromosome 8NC_012014.3 (14006855..14009834)
ID: 100246597
44. LOC100245065
glutathione S-transferase U17-like[Vitis vinifera]
Other Aliases: GSVIVT00028958001
Chromosome: 1
Annotation: Chromosome 1NC_012007.3 (10305486..10306881)
ID: 100245065
45. LOC100853047
probable glutathione S-transferase parC-like[Vitis vinifera]
Chromosome: 19
Annotation: Chromosome 19NC_012025.3 (12827949..12829261, complement)
ID: 100853047
46. LOC100261962
glutathione S-transferase L3-like[Vitis vinifera]
Chromosome: 8
Annotation: Chromosome 8NC_012014.3 (14063164..14066108, complement)
ID: 100261962
47. LOC100256345
probable glutathione S-transferase parC-like[Vitis vinifera]
Chromosome: 19
Annotation: Chromosome 19NC_012025.3 (12760340..12824871, complement)
ID: 100256345
48. LOC100253183
probable glutathione S-transferase-like[Vitis vinifera]
Chromosome: 19
Annotation: Chromosome 19NC_012025.3 (12680232..12684582, complement)
ID: 100253183
49. LOC100265722
glutathione S-transferase U9-like[Vitis vinifera]
Chromosome: 17
Annotation: Chromosome 17NC_012023.3 (6681957..6682289)
ID: 100265722
50. LOC100232878
glutathione-S-transferase[Vitis vinifera]
Other Aliases: GSVIVT00000218001
Chromosome: 19
Annotation: Chromosome 19NC_012025.3 (13399176..13400508, complement)
ID: 100232878
51. LOC100254264
probable glutathione S-transferase parA-like[Vitis vinifera]
Other Aliases: GSVIVT00006668001
Chromosome: 19
Annotation: Chromosome 19NC_012025.3 (17054177..17055451, complement)
ID: 100254264
52. LOC100267378
glutathione S-transferase U17-like[Vitis vinifera]
Other Aliases: GSVIVT00028960001
Chromosome: 1
Annotation: Chromosome 1NC_012007.3 (10347285..10348110)
ID: 100267378
53. LOC100265903
glutathione S-transferase-like[Vitis vinifera]
Other Aliases: GSVIVT00027957001
Chromosome: 7
Annotation: Chromosome 7NC_012013.3 (2846560..2848038, complement)
ID: 100265903
54. LOC100265481
probable glutathione S-transferase-like[Vitis vinifera]
Other Aliases: GSVIVT00008584001
Chromosome: Un
ID: 100265481
55. LOC100265455
glutathione S-transferase U10-like[Vitis vinifera]
Other Aliases: GSVIVT00036966001
Chromosome: 1
Annotation: Chromosome 1NC_012007.3 (11957515..11958418)
ID: 100265455
56. LOC100264717
probable glutathione S-transferase-like[Vitis vinifera]
Other Aliases: GSVIVT00017769001
Chromosome: 17
Annotation: Chromosome 17NC_012023.3 (2705586..2706569, complement)
ID: 100264717
57. LOC100264557
probable glutathione S-transferase-like[Vitis vinifera]
Other Aliases: GSVIVT00006659001
Chromosome: 19
Annotation: Chromosome 19NC_012025.3 (16876921..16878120)
ID: 100264557
58. LOC100263347
glutathione S-transferase-like[Vitis vinifera]
Other Aliases: GSVIVT01035262001
Chromosome: 4
Annotation: Chromosome 4NC_012010.3 (11587680..11589283, complement)
ID: 100263347
59. LOC100262772
probable glutathione S-transferase parC-like[Vitis vinifera]
Other Aliases: GSVIVT00006642001
Chromosome: 19
Annotation: Chromosome 19NC_012025.3 (16626367..16628035)
ID: 100262772
60. LOC100260869
glutathione S-transferase PARB-like[Vitis vinifera]
Other Aliases: GSVIVT00015524001
Chromosome: 18
Annotation: Chromosome 18NC_012024.3 (1460971..1462318, complement)
ID: 100260869
61. LOC100260496
glutathione S-transferase U9-like[Vitis vinifera]
Other Aliases: GSVIVT00000141001
Chromosome: 17
Annotation: Chromosome 17NC_012023.3 (6686593..6687473)
ID: 100260496
62. LOC100257648
probable glutathione S-transferase-like[Vitis vinifera]
Other Aliases: GSVIVT00006646001
Chromosome: 19
Annotation: Chromosome 19NC_012025.3 (16675410..16677190, complement)
ID: 100257648
63. LOC100257608
probable glutathione S-transferase-like[Vitis vinifera]
Other Aliases: GSVIVT00017770001
Chromosome: 17
Annotation: Chromosome 17NC_012023.3 (2698552..2704955, complement)
ID: 100257608
64. LOC100256700
probable glutathione S-transferase-like[Vitis vinifera]
Other Aliases: GSVIVT00012190001
Chromosome: 19
Annotation: Chromosome 19NC_012025.3 (13044744..13046035, complement)
ID: 100256700
65. LOC100254975
probable glutathione S-transferase parA-like[Vitis vinifera]
Other Aliases: GSVIVT00000967001
Chromosome: 19
Annotation: Chromosome 19NC_012025.3 (17210328..17211134)
ID: 100254975
66. LOC100251134
probable glutathione S-transferase-like[Vitis vinifera]
Other Aliases: GSVIVT00020273001
Chromosome: 5
Annotation: Chromosome 5NC_012011.3 (8146893..8147830)
ID: 100251134
67. LOC100250199
glutathione S-transferase U17-like[Vitis vinifera]
Other Aliases: GSVIVT00028957001
Chromosome: 1
Annotation: Chromosome 1NC_012007.3 (10300523..10301575)
ID: 100250199
68. LOC100249365
glutathione S-transferase PARB-like[Vitis vinifera]
Other Aliases: GSVIVT00023539001
Chromosome: 7
Annotation: Chromosome 7NC_012013.3 (2815962..2816813)
ID: 100249365
69. LOC100247639
glutathione S-transferase F13-like[Vitis vinifera]
Other Aliases: GSVIVT00023540001
Chromosome: 7
Annotation: Chromosome 7NC_012013.3 (2812485..2813769)
ID: 100247639
70. LOC100246830
glutathione S-transferase U7-like[Vitis vinifera]
Other Aliases: GSVIVT00024209001
Chromosome: 6
Annotation: Chromosome 6NC_012012.3 (6483368..6484106)
ID: 100246830
71. LOC100245600
probable glutathione S-transferase-like[Vitis vinifera]
Other Aliases: GSVIVT00006638001
Chromosome: 19
Annotation: Chromosome 19NC_012025.3 (16570345..16572001)
ID: 100245600
72. LOC100245078
probable glutathione S-transferase-like[Vitis vinifera]
Other Aliases: GSVIVT00009775001
Chromosome: 19
Annotation: Chromosome 19NC_012025.3 (13256049..13260661, complement)
ID: 100245078
73. LOC100244980
glutathione S-transferase U7-like[Vitis vinifera]
Other Aliases: GSVIVT00024206001
Chromosome: 6
Annotation: Chromosome 6NC_012012.3 (6492565..6493809)
ID: 100244980
74. LOC100243577
glutathione S-transferase-like[Vitis vinifera]
Other Aliases: GSVIVT00027954001
Chromosome: 7
Annotation: Chromosome 7NC_012013.3 (2837297..2838824)
ID: 100243577
75. LOC100243021
probable glutathione S-transferase-like[Vitis vinifera]
Other Aliases: GSVIVT00028454001
Chromosome: 7
Annotation: Chromosome 7NC_012013.3 (8137400..8138256, complement)
ID: 100243021
76. LOC100242734
probable glutathione S-transferase-like[Vitis vinifera]
Other Aliases: GSVIVT00023461001
Chromosome: 4
Annotation: Chromosome 4NC_012010.3 (10795507..10796386, complement)
ID: 100242734
77. LOC100242506
glutathione S-transferase F13-like[Vitis vinifera]
Other Aliases: GSVIVT00023541001
Chromosome: 7
Annotation: Chromosome 7NC_012013.3 (2806886..2808343)
ID: 100242506
78. LOC100242434
probable glutathione S-transferase-like[Vitis vinifera]
Other Aliases: GSVIVT00017766001
Chromosome: 17
Annotation: Chromosome 17NC_012023.3 (2721073..2722233, complement)
ID: 100242434
79. LOC100241712
glutathione S-transferase U7-like[Vitis vinifera]
Other Aliases: GSVIVT00024211001
Chromosome: 6
Annotation: Chromosome 6NC_012012.3 (6476925..6477830)
ID: 100241712
80. LOC100233043
glutathione S-transferase 5[Vitis vinifera]
Other Aliases: GSVIVT01020831001GST5, GST5tr
Chromosome: 12
Annotation: Chromosome 12NC_012018.3 (1438506..1439976, complement)
ID: 100233043
81. LOC100853365
probable glutathione S-transferase parC-like[Vitis vinifera]
Chromosome: 19
Annotation: Chromosome 19NC_012025.3 (13466225..13467293, complement)
ID: 100853365
82. LOC100853143
probable glutathione S-transferase-like[Vitis vinifera]
Chromosome: 19
Annotation: Chromosome 19NC_012025.3 (12999415..13001107, complement)
ID: 100853143
83. LOC100852677
probable glutathione S-transferase-like[Vitis vinifera]
Chromosome: 5
Annotation: Chromosome 5NC_012011.3 (10533579..10534725)
ID: 100852677
84. LOC100267917
probable glutathione S-transferase-like[Vitis vinifera]
Chromosome: 19
Annotation: Chromosome 19NC_012025.3 (16593685..16595264)
ID: 100267917
85. LOC100267881
probable glutathione S-transferase-like[Vitis vinifera]
Chromosome: 17
Annotation: Chromosome 17NC_012023.3 (2719842..2720590, complement)
ID: 100267881
86. LOC100266592
probable glutathione S-transferase-like[Vitis vinifera]
Chromosome: 5
Annotation: Chromosome 5NC_012011.3 (8104345..8105152)
ID: 100266592
87. LOC100263691
glutathione S-transferase U10-like[Vitis vinifera]
Chromosome: 1
Annotation: Chromosome 1NC_012007.3 (11974879..11975969)
ID: 100263691
88. LOC100261388
probable glutathione S-transferase-like[Vitis vinifera]
Chromosome: 5
Annotation: Chromosome 5NC_012011.3 (8118410..8119129)
ID: 100261388
89. LOC100260235
glutathione S-transferase U10-like[Vitis vinifera]
Chromosome: 1
Annotation: Chromosome 1NC_012007.3 (11948149..11949124)
ID: 100260235
90. LOC100260070
probable glutathione S-transferase MSR-1-like[Vitis vinifera]
Chromosome: 19
Annotation: Chromosome 19NC_012025.3 (17144676..17146049, complement)
ID: 100260070
91. LOC100259245
probable glutathione S-transferase-like[Vitis vinifera]
Chromosome: 15
Annotation: Chromosome 15NC_012021.3 (3392226..3393271, complement)
ID: 100259245
92. LOC100258047
probable glutathione S-transferase-like[Vitis vinifera]
Chromosome: 14
Annotation: Chromosome 14NC_012020.3 (1745985..1757369, complement)
ID: 100258047
93. LOC100257074
probable glutathione S-transferase-like[Vitis vinifera]
Chromosome: 15
Annotation: Chromosome 15NC_012021.3 (8190841..8193304)
ID: 100257074
94. LOC100256968
glutathione S-transferase U9-like[Vitis vinifera]
Chromosome: 17
Annotation: Chromosome 17NC_012023.3 (6689807..6690995)
ID: 100256968
95. LOC100255277
glutathione S-transferase U8-like[Vitis vinifera]
Chromosome: 6
Annotation: Chromosome 6NC_012012.3 (6496794..6499471)
ID: 100255277
96. LOC100252492
probable glutathione S-transferase-like[Vitis vinifera]
Chromosome: 19
Annotation: Chromosome 19NC_012025.3 (19309633..19310643)
ID: 100252492
97. LOC100251575
glutathione S-transferase U25-like[Vitis vinifera]
Chromosome: 19
Annotation: Chromosome 19NC_012025.3 (13011388..13011912, complement)
ID: 100251575
98. LOC100250733
probable glutathione S-transferase parC-like[Vitis vinifera]
Chromosome: 19
Annotation: Chromosome 19NC_012025.3 (16531713..16532692)
ID: 100250733
99. LOC100246477
probable glutathione S-transferase-like[Vitis vinifera]
Chromosome: Un
ID: 100246477
100. LOC100245369
probable glutathione S-transferase-like[Vitis vinifera]
Chromosome: 15
Annotation: Chromosome 15NC_012021.3 (3424910..3425987, complement)
ID: 100245369
101. LOC100244908
glutathione S-transferase U9-like[Vitis vinifera]
Chromosome: 17
Annotation: Chromosome 17NC_012023.3 (6701821..6702672)
ID: 100244908
102. LOC100243397
glutathione S-transferase U9-like[Vitis vinifera]
Chromosome: 17
Annotation: Chromosome 17NC_012023.3 (6677933..6678834)
ID: 100243397
103. LOC100247682
glutathione S-transferase U8-like[Vitis vinifera]
Other Aliases: GSVIVT00021415001
Chromosome: 8
Annotation: Chromosome 8NC_012014.3 (15473054..15474233)
ID: 100247682
104. LOC100242689
glutathione S-transferase T1-like[Vitis vinifera]
Other Aliases: GSVIVT00000406001
Chromosome: 2
Annotation: Chromosome 2NC_012008.3 (3156604..3161764)
ID: 100242689
105. LOC100242547
glutathione S-transferase U8-like[Vitis vinifera]
Other Aliases: GSVIVT00021417001
Chromosome: 8
Annotation: Chromosome 8NC_012014.3 (15484973..15485762)
ID: 100242547
106. LOC100854682
probable glutathione S-transferase-like[Vitis vinifera]
Chromosome: Un
ID: 100854682
107. LOC100267288
glutathione S-transferase U7-like[Vitis vinifera]
Chromosome: 6
Annotation: Chromosome 6NC_012012.3 (6491420..6492044)
ID: 100267288
108. LOC100264838
glutathione S-transferase U8-like[Vitis vinifera]
Chromosome: 8
Annotation: Chromosome 8NC_012014.3 (15495161..15496201)
ID: 100264838
109. LOC100263925
probable glutathione S-transferase parA-like[Vitis vinifera]
Chromosome: 19
Annotation: Chromosome 19NC_012025.3 (17114099..17114848)
ID: 100263925
110. LOC100257597
probable glutathione S-transferase parC-like[Vitis vinifera]
Chromosome: Un
ID: 100257597
111. LOC100256295
probable glutathione S-transferase-like[Vitis vinifera]
Chromosome: 5
Annotation: Chromosome 5NC_012011.3 (10845256..10861346, complement)
ID: 100256295
112. LOC100250115
probable glutathione S-transferase-like[Vitis vinifera]
Chromosome: 6
Annotation: Chromosome 6NC_012012.3 (6494492..6495080)
ID: 100250115
113. LOC100249777
probable glutathione S-transferase MSR-1-like[Vitis vinifera]
Chromosome: 10
Annotation: Chromosome 10NC_012016.3 (7197211..7197976)
ID: 100249777
114. LOC100248890
glutathione S-transferase U8-like[Vitis vinifera]
Chromosome: 15
Annotation: Chromosome 15NC_012021.3 (3021377..3022100, complement)
ID: 100248890
115. LOC100242273
probable glutathione S-transferase parC-like[Vitis vinifera]
Chromosome: 19
Annotation: Chromosome 19NC_012025.3 (16798087..16803919)
ID: 100242273
116. GST2
glutathione S-transferase[Vitis vinifera]
ID: 100233092
117. LOC100265100
microsomal glutathione S-transferase 3-like[Vitis vinifera]
Other Aliases: GSVIVT00023521001
Chromosome: 4
Annotation: Chromosome 4NC_012010.3 (12133769..12135694, complement)
ID: 100265100
118. LOC100260848
glutathione S-transferase zeta class-like[Vitis vinifera]
Other Aliases: VIT_00027608001
Chromosome: 15
Annotation: Chromosome 15NC_012021.3 (15085283..15090948)
ID: 100260848
119. LOC100257402
glutathione S-transferase zeta class-like[Vitis vinifera]
Chromosome: 12
Annotation: Chromosome 12NC_012018.3 (22458027..22460550, complement)
ID: 100257402
120. LOC100252270
glutathione S-transferase zeta class-like[Vitis vinifera]
Chromosome: 12
Annotation: Chromosome 12NC_012018.3 (22461426..22480030, complement)
ID: 100252270
121. LOC100854598
microsomal glutathione S-transferase 3-like[Vitis vinifera]
Chromosome: 19
Annotation: Chromosome 19NC_012025.3 (21657718..21660630, complement)
ID: 100854598
122. LOC100854757
probable glutathione S-transferase-like[Vitis vinifera]
Chromosome: 15
Annotation: Chromosome 15NC_012021.3 (3058552..3065700)
ID: 100854757
123. LOC100267351
glutathione S-transferase U18-like[Vitis vinifera]
Chromosome: 1
Annotation: Chromosome 1NC_012007.3 (10319536..10326478)
ID: 100267351
124. LOC100251946
probable glutathione S-transferase-like[Vitis vinifera]
Chromosome: 15
Annotation: Chromosome 15NC_012021.3 (8205185..8212209)
ID: 100251946
125. LOC100251246
glutathione S-transferase F13-like[Vitis vinifera]
Chromosome: 6
Annotation: Chromosome 6NC_012012.3 (12206292..12208323)
ID: 100251246
126. LOC100251558
glutathione transferase GST 23-like[Vitis vinifera]
Other Aliases: GSVIVT00028452001
Chromosome: 7
Annotation: Chromosome 7NC_012013.3 (8141024..8142232, complement)
ID: 100251558
137. LOC100256292
glutathione transferase GST 23-like[Vitis vinifera]
Other Aliases: GSVIVT00020272001
Chromosome: 5
Annotation: Chromosome 5NC_012011.3 (8137438..8138374)
ID: 100256292
138. LOC100254124
glutathione transferase GST 23-like[Vitis vinifera]
Other Aliases: GSVIVT00022906001
Chromosome: 15
Annotation: Chromosome 15NC_012021.3 (3085355..3086351)
ID: 100254124
141. LOC100248141
glutathione transferase GST 23-like[Vitis vinifera]
Other Aliases: GSVIVT00028453001
Chromosome: 7
Annotation: Chromosome 7NC_012013.3 (8139474..8140322, complement)
ID: 100248141
142. LOC100245995
glutathione transferase GST 23-like[Vitis vinifera]
Other Aliases: GSVIVT00020275001
Chromosome: 5
Annotation: Chromosome 5NC_012011.3 (8170768..8171787)
ID: 100245995
144. LOC100244144
glutathione transferase GST 23-like[Vitis vinifera]
Other Aliases: GSVIVT00020419001
Chromosome: 5
Annotation: Chromosome 5NC_012011.3 (10653001..10654141, complement)
ID: 100244144
146. LOC100242618
glutathione transferase GST 23-like[Vitis vinifera]
Other Aliases: VIT_00024290001
Chromosome: 16
Annotation: Chromosome 16NC_012022.3 (578420..580042)
ID: 100242618
147. LOC100853003
glutathione transferase GST 23-like[Vitis vinifera]
Chromosome: 5
Annotation: Chromosome 5NC_012011.3 (10733237..10734677, complement)
ID: 100853003
148. LOC100852746
glutathione transferase GST 23-like[Vitis vinifera]
Chromosome: 5
Annotation: Chromosome 5NC_012011.3 (10543134..10544181, complement)
ID: 100852746
150. LOC100259640
glutathione transferase GST 23-like[Vitis vinifera]
Chromosome: 16
Annotation: Chromosome 16NC_012022.3 (534926..537112, complement)
ID: 100259640
153. LOC100257522
glutathione transferase GST 23-like[Vitis vinifera]
Chromosome: 18
Annotation: Chromosome 18NC_012024.3 (5244641..5245588, complement)
ID: 100257522
154. LOC100254521
glutathione transferase GST 23-like[Vitis vinifera]
Chromosome: 16
Annotation: Chromosome 16NC_012022.3 (541617..543705, complement)
ID: 100254521
156. LOC100262021
glutathione transferase GST 23-like[Vitis vinifera]
Other Aliases: VIT_00025782001
Chromosome: 8
Annotation: Chromosome 8NC_012014.3 (11923426..11924585)
ID: 100262021
157. LOC100253876
glutathione transferase GST 23-like[Vitis vinifera]
Other Aliases: GSVIVT00031741001
Chromosome: 18
Annotation: Chromosome 18NC_012024.3 (19496010..19496763, complement)
ID: 100253876
159. LOC100259774
probable phospholipid hydroperoxide glutathione peroxidase 6, mitochondrial-like[Vitis vinifera]
Other Aliases: GSVIVT00000409001
Chromosome: 2
Annotation: Chromosome 2NC_012008.3 (3140928..3153615, complement)
ID: 100259774
160. LOC100254672
probable glutathione peroxidase 8-like[Vitis vinifera]
Other Aliases: GSVIVT00000410001
Chromosome: 2
Annotation: Chromosome 2NC_012008.3 (3137803..3140779, complement)
ID: 100254672
161. LOC100245705
probable glutathione peroxidase 2-like[Vitis vinifera]
Other Aliases: GSVIVT00001920001
Chromosome: 5
Annotation: Chromosome 5NC_012011.3 (21967359..21971056)
ID: 100245705
162. LOC100245697
phospholipid hydroperoxide glutathione peroxidase 1, chloroplastic-like[Vitis vinifera]
Other Aliases: GSVIVT00032791001
Chromosome: 4
Annotation: Chromosome 4NC_012010.3 (6786171..6793242)
ID: 100245697
163. LOC100242497
probable glutathione peroxidase 4-like[Vitis vinifera]
Other Aliases: GSVIVT00023686001
Chromosome: 7
Annotation: Chromosome 7NC_012013.3 (1577482..1583295, complement)
ID: 100242497
164. LOC100232945
class III peroxidase GvPx2b[Vitis vinifera]
Chromosome: 18
Annotation: Chromosome 18NC_012024.3 (5092206..5094227)
ID: 100232945
165. LOC100262330
peroxidase 27-like[Vitis vinifera]
Other Aliases: GSVIVT00006924001
Chromosome: 10
Annotation: Chromosome 10NC_012016.3 (155483..156937, complement)
ID: 100262330
166. LOC100250514
peroxidase 64-like[Vitis vinifera]
Other Aliases: VIT_00008763001
Chromosome: 18
Annotation: Chromosome 18NC_012024.3 (1778147..1783162)
ID: 100250514
167. LOC100249258
peroxidase 18-like[Vitis vinifera]
Other Aliases: GSVIVT00032814001
Chromosome: 4
Annotation: Chromosome 4NC_012010.3 (7134492..7137081)
ID: 100249258
168. LOC100247634
peroxidase 3-like[Vitis vinifera]
Other Aliases: GSVIVT00023610001
Chromosome: 7
Annotation: Chromosome 7NC_012013.3 (2184088..2186987, complement)
ID: 100247634
169. LOC100854291
peroxidase 5-like[Vitis vinifera]
Chromosome: 16
Annotation: Chromosome 16NC_012022.3 (21154062..21155489)
ID: 100854291
170. LOC100265513
lignin-forming anionic peroxidase-like[Vitis vinifera]
Other Aliases: GSVIVT00024722001
Chromosome: 6
Annotation: Chromosome 6NC_012012.3 (1272284..1274454, complement)
ID: 100265513
171. LOC100258717
peroxidase 66-like[Vitis vinifera]
Other Aliases: GSVIVT01010664001
Chromosome: 16
Annotation: Chromosome 16NC_012022.3 (15385324..15386478, complement)
ID: 100258717
172. LOC100241814
peroxidase 42-like[Vitis vinifera]
Other Aliases: GSVIVT00010753001
Chromosome: 10
Annotation: Chromosome 10NC_012016.3 (1056611..1058737)
ID: 100241814
173. LOC100267361
peroxidase 65-like[Vitis vinifera]
Other Aliases: VITISV_013676
Chromosome: 17
Annotation: Chromosome 17NC_012023.3 (8730739..8732156, complement)
ID: 100267361
174. LOC100267732
peroxidase 64-like[Vitis vinifera]
Other Aliases: GSVIVT00011734001
Chromosome: Un
ID: 100267732
175. LOC100266458
peroxidase 73-like[Vitis vinifera]
Other Aliases: GSVIVT00019639001
Chromosome: 7
Annotation: Chromosome 7NC_012013.3 (15621175..15622997, complement)
ID: 100266458
176. LOC100265025
putative Peroxidase 48-like[Vitis vinifera]
Other Aliases: GSVIVT01010156001
Chromosome: 1
Annotation: Chromosome 1NC_012007.3 (16513246..16521228, complement)
ID: 100265025
177. LOC100264421
peroxidase 4-like[Vitis vinifera]
Other Aliases: GSVIVT00018769001
Chromosome: 12
Annotation: Chromosome 12NC_012018.3 (2468211..2469821, complement)
ID: 100264421
178. LOC100264145
Peroxidase 5[Vitis vinifera]
Other Aliases: GSVIVT00037159001
Chromosome: 16
Annotation: Chromosome 16NC_012022.2 (7270101..7271335)
ID: 100264145
179. LOC100262758
peroxidase 25-like[Vitis vinifera]
Other Aliases: GSVIVT00016899001
Chromosome: 11
Annotation: Chromosome 11NC_012017.3 (4652566..4653819, complement)
ID: 100262758
180. LOC100262575
peroxidase 20-like[Vitis vinifera]
Other Aliases: GSVIVT01013238001
Chromosome: 2
Annotation: Chromosome 2NC_012008.3 (6404335..6406247, complement)
ID: 100262575
181. LOC100262265
peroxidase N1-like[Vitis vinifera]
Other Aliases: GSVIVT00031599001
Chromosome: 12
Annotation: Chromosome 12NC_012018.3 (14512960..14514222)
ID: 100262265
182. LOC100262115
peroxidase 7-like[Vitis vinifera]
Other Aliases: GSVIVT00002117001
Chromosome: 19
Annotation: Chromosome 19NC_012025.3 (23628375..23629597, complement)
ID: 100262115
183. LOC100261517
peroxidase 11-like[Vitis vinifera]
Other Aliases: GSVIVT00021203001
Chromosome: 1
Annotation: Chromosome 1NC_012007.3 (16683140..16684623, complement)
ID: 100261517
184. LOC100261264
peroxidase 47-like[Vitis vinifera]
Other Aliases: VIT_00000248001
Chromosome: 7
Annotation: Chromosome 7NC_012013.3 (20506450..20508060, complement)
ID: 100261264
185. LOC100260202
peroxidase 27-like[Vitis vinifera]
Other Aliases: GSVIVT00026052001
Chromosome: 12
Annotation: Chromosome 12NC_012018.3 (7190481..7192191)
ID: 100260202
186. LOC100259249
peroxidase 4-like[Vitis vinifera]
Other Aliases: GSVIVT00018771001
Chromosome: 12
Annotation: Chromosome 12NC_012018.3 (2459695..2461558, complement)
ID: 100259249
187. LOC100258515
cationic peroxidase 1-like[Vitis vinifera]
Other Aliases: GSVIVT00037461001
Chromosome: 8
Annotation: Chromosome 8NC_012014.3 (10343072..10344443)
ID: 100258515
188. LOC100257692
probable peroxidase 61-like[Vitis vinifera]
Other Aliases: GSVIVT00034598001
Chromosome: 5
ID: 100257692
189. LOC100257440
cationic peroxidase 1-like[Vitis vinifera]
Other Aliases: GSVIVT00015159001
Chromosome: 18
Annotation: Chromosome 18NC_012024.3 (5102794..5105028)
ID: 100257440
190. LOC100257059
peroxidase 4-like[Vitis vinifera]
Other Aliases: GSVIVT00029403001
Chromosome: 13
Annotation: Chromosome 13NC_012019.3 (1304531..1306021)
ID: 100257059
191. LOC100256842
peroxidase 21-like[Vitis vinifera]
Other Aliases: GSVIVT01025650001
Chromosome: 8
Annotation: Chromosome 8NC_012014.3 (13311735..13313150)
ID: 100256842
192. LOC100254998
putative Peroxidase 48-like[Vitis vinifera]
Other Aliases: VIT_00017084001
Chromosome: 9
Annotation: Chromosome 9NC_012015.3 (4061965..4064269, complement)
ID: 100254998
193. LOC100254434
peroxidase 24-like[Vitis vinifera]
Other Aliases: GSVIVT00019843001
Chromosome: 5
Annotation: Chromosome 5NC_012011.3 (3846138..3847498)
ID: 100254434
194. LOC100254380
peroxidase-like[Vitis vinifera]
Other Aliases: GSVIVT00020782001
Chromosome: 14
Annotation: Chromosome 14NC_012020.3 (28010263..28013326)
ID: 100254380
195. LOC100254001
peroxidase 66-like[Vitis vinifera]
Other Aliases: GSVIVT00013661001
Chromosome: 16
Annotation: Chromosome 16NC_012022.3 (15204367..15205528, complement)
ID: 100254001
196. LOC100252708
lignin-forming anionic peroxidase-like[Vitis vinifera]
Other Aliases: GSVIVT00035152001
Chromosome: 1
Annotation: Chromosome 1NC_012007.3 (18638901..18640222)
ID: 100252708
197. LOC100247600
lignin-forming anionic peroxidase-like[Vitis vinifera]
Other Aliases: GSVIVT00035153001
Chromosome: 1
Annotation: Chromosome 1NC_012007.3 (18632632..18633953)
ID: 100247600
198. LOC100243422
peroxidase 5-like[Vitis vinifera]
Other Aliases: GSVIVT00028183001
Chromosome: 7
Annotation: Chromosome 7NC_012013.3 (4544906..4546027)
ID: 100243422
199. LOC100242338
peroxidase 17-like[Vitis vinifera]
Other Aliases: GSVIVT00004405001
Chromosome: 7
Annotation: Chromosome 7NC_012013.3 (14810226..14811836)
ID: 100242338
200. LOC100242093
peroxidase 9-like[Vitis vinifera]
Other Aliases: GSVIVT00014550001
Chromosome: 18
Annotation: Chromosome 18NC_012024.3 (11184119..11185662, complement)
ID: 100242093
201. LOC100854817
peroxidase 12-like[Vitis vinifera]
Chromosome: 18
Annotation: Chromosome 18NC_012024.3 (19199562..19202397, complement)
ID: 100854817
202. LOC100854567
peroxidase N1-like[Vitis vinifera]
Chromosome: 12
Annotation: Chromosome 12NC_012018.3 (14627717..14640503)
ID: 100854567
203. LOC100853331
peroxidase 5-like[Vitis vinifera]
Chromosome: 16
Annotation: Chromosome 16NC_012022.3 (21152029..21153432)
ID: 100853331
204. LOC100267701
cationic peroxidase 1-like[Vitis vinifera]
Chromosome: 18
Annotation: Chromosome 18NC_012024.3 (5121795..5123595)
ID: 100267701
205. LOC100267628
peroxidase N1-like[Vitis vinifera]
Chromosome: 12
Annotation: Chromosome 12NC_012018.3 (14453804..14454963)
ID: 100267628
206. LOC100267515
peroxidase N1-like[Vitis vinifera]
Chromosome: 12
Annotation: Chromosome 12NC_012018.3 (14600711..14601914, complement)
ID: 100267515
207. LOC100264755
lignin-forming anionic peroxidase-like[Vitis vinifera]
Chromosome: 1
Annotation: Chromosome 1NC_012007.3 (18621130..18622440)
ID: 100264755
208. LOC100263220
lignin-forming anionic peroxidase-like[Vitis vinifera]
Chromosome: 1
Annotation: Chromosome 1NC_012007.3 (18657363..18658564, complement)
ID: 100263220
209. LOC100262247
peroxidase N1-like[Vitis vinifera]
Chromosome: 12
Annotation: Chromosome 12NC_012018.3 (14468604..14469732)
ID: 100262247
210. LOC100262192
peroxidase 60-like[Vitis vinifera]
Chromosome: 6
Annotation: Chromosome 6NC_012012.3 (20717073..20718732)
ID: 100262192
211. LOC100261249
peroxidase 31-like[Vitis vinifera]
Chromosome: 14
Annotation: Chromosome 14NC_012020.3 (28160797..28162035)
ID: 100261249
212. LOC100260174
peroxidase 27-like[Vitis vinifera]
Chromosome: 12
Annotation: Chromosome 12NC_012018.3 (7187086..7188352)
ID: 100260174
213. LOC100259700
lignin-forming anionic peroxidase-like[Vitis vinifera]
Chromosome: 1
Annotation: Chromosome 1NC_012007.3 (18652712..18653969, complement)
ID: 100259700
214. LOC100257139
peroxidase N1-like[Vitis vinifera]
Chromosome: 12
Annotation: Chromosome 12NC_012018.3 (14484471..14485978)
ID: 100257139
215. LOC100254910
peroxidase 51-like[Vitis vinifera]
Chromosome: 10
Annotation: Chromosome 10NC_012016.3 (12737786..12746873)
ID: 100254910
216. LOC100254462
lignin-forming anionic peroxidase-like[Vitis vinifera]
Chromosome: 1
Annotation: Chromosome 1NC_012007.3 (18605528..18614714, complement)
ID: 100254462
217. LOC100252282
cationic peroxidase 1-like[Vitis vinifera]
Chromosome: 18
Annotation: Chromosome 18NC_012024.3 (5107201..5108977)
ID: 100252282
218. LOC100250264
peroxidase 19-like[Vitis vinifera]
Chromosome: 10
Annotation: Chromosome 10NC_012016.3 (1870341..1872340, complement)
ID: 100250264
219. LOC100249955
peroxidase 40-like[Vitis vinifera]
Chromosome: 5
Annotation: Chromosome 5NC_012011.3 (524021..525452, complement)
ID: 100249955
220. LOC100249751
peroxidase 55-like[Vitis vinifera]
Chromosome: 14
Annotation: Chromosome 14NC_012020.3 (25593768..25595657, complement)
ID: 100249751
221. LOC100249548
peroxidase 7-like[Vitis vinifera]
Chromosome: 1
Annotation: Chromosome 1NC_012007.3 (14982723..14984281)
ID: 100249548
222. LOC100246878
cationic peroxidase 2-like[Vitis vinifera]
Chromosome: 12
Annotation: Chromosome 12NC_012018.3 (14508710..14510030)
ID: 100246878
223. LOC100246743
cationic peroxidase 1-like[Vitis vinifera]
Chromosome: 6
Annotation: Chromosome 6NC_012012.3 (8545233..8546669, complement)
ID: 100246743
224. LOC100245373
peroxidase 43-like[Vitis vinifera]
Chromosome: 18
Annotation: Chromosome 18NC_012024.3 (13521155..13523326, complement)
ID: 100245373
225. LOC100265920
peroxidase 53-like[Vitis vinifera]
Other Aliases: GSVIVT01033484001
Chromosome: 8
Annotation: Chromosome 8NC_012014.3 (20339203..20340580)
ID: 100265920
226. LOC100264023
peroxidase 10-like[Vitis vinifera]
Other Aliases: GSVIVT00036533001
Chromosome: 3
Annotation: Chromosome 3NC_012009.3 (4477616..4479745, complement)
ID: 100264023
227. LOC100261865
peroxidase 29-like[Vitis vinifera]
Other Aliases: GSVIVT00033150001
Chromosome: 5
Annotation: Chromosome 5NC_012011.3 (681456..682628, complement)
ID: 100261865
228. LOC100261539
peroxidase 16-like[Vitis vinifera]
Other Aliases: GSVIVT00031338001
Chromosome: 11
Annotation: Chromosome 11NC_012017.3 (18137499..18139979, complement)
ID: 100261539
229. LOC100260291
peroxidase 15-like[Vitis vinifera]
Other Aliases: GSVIVT00024724001
Chromosome: 6
Annotation: Chromosome 6NC_012012.3 (1261660..1263339, complement)
ID: 100260291
230. LOC100257005
Peroxidase 4[Vitis vinifera]
Other Aliases: GSVIVT00023967001
Chromosome: 6
Annotation: Chromosome 6NC_012012.3 (8561978..8564403)
ID: 100257005
231. LOC100255112
peroxidase 3-like[Vitis vinifera]
Other Aliases: GSVIVT00026053001
Chromosome: 12
Annotation: Chromosome 12NC_012018.3 (7196580..7198006)
ID: 100255112
232. LOC100253646
peroxidase N-like[Vitis vinifera]
Other Aliases: GSVIVT00024717001
Chromosome: 6
Annotation: Chromosome 6NC_012012.3 (1429343..1431660)
ID: 100253646
233. LOC100249514
peroxidase 5-like[Vitis vinifera]
Other Aliases: GSVIVT00009482001
Chromosome: Un
ID: 100249514
234. LOC100245432
peroxidase 72-like[Vitis vinifera]
Other Aliases: GSVIVT00036874001
Chromosome: 4
Annotation: Chromosome 4NC_012010.3 (19132072..19133698)
ID: 100245432
235. LOC100245326
peroxidase N1-like[Vitis vinifera]
Other Aliases: GSVIVT01029771001
Chromosome: 12
Annotation: Chromosome 12NC_012018.3 (14448034..14449637, complement)
ID: 100245326
236. LOC100855242
peroxidase 25-like[Vitis vinifera]
Chromosome: 11
Annotation: Chromosome 11NC_012017.3 (4611220..4612698, complement)
ID: 100855242
237. LOC100854196
peroxidase 64-like[Vitis vinifera]
Chromosome: Un
ID: 100854196
238. LOC100854151
cationic peroxidase 1-like[Vitis vinifera]
Chromosome: 6
Annotation: Chromosome 6NC_012012.3 (8540371..8545258)
ID: 100854151
239. LOC100266922
peroxidase 55-like[Vitis vinifera]
Chromosome: 14
Annotation: Chromosome 14NC_012020.3 (25585922..25589154, complement)
ID: 100266922
240. LOC100264885
lignin-forming anionic peroxidase-like[Vitis vinifera]
Chromosome: 1
Annotation: Chromosome 1NC_012007.3 (18658725..18669651)
ID: 100264885
241. LOC100263665
cationic peroxidase 1-like[Vitis vinifera]
Chromosome: 8
Annotation: Chromosome 8NC_012014.3 (10329165..10332083)
ID: 100263665
242. LOC100261461
peroxidase 24-like[Vitis vinifera]
Chromosome: 5
Annotation: Chromosome 5NC_012011.3 (3833101..3844012)
ID: 100261461
243. LOC100260726
peroxidase 43-like[Vitis vinifera]
Chromosome: 12
Annotation: Chromosome 12NC_012018.3 (14103613..14106189, complement)
ID: 100260726
244. LOC100258705
peroxidase 65-like[Vitis vinifera]
Chromosome: 1
Annotation: Chromosome 1NC_012007.3 (9693927..9695666)
ID: 100258705
245. LOC100256220
peroxidase 10-like[Vitis vinifera]
Chromosome: Un
ID: 100256220
246. LOC100255891
peroxidase 25-like[Vitis vinifera]
Chromosome: 11
Annotation: Chromosome 11NC_012017.3 (4625372..4626656, complement)
ID: 100255891
247. LOC100253452
cationic peroxidase 1-like[Vitis vinifera]
Chromosome: 8
Annotation: Chromosome 8NC_012014.3 (10337165..10338973)
ID: 100253452
248. LOC100248618
cationic peroxidase 2-like[Vitis vinifera]
Chromosome: 12
Annotation: Chromosome 12NC_012018.3 (14550273..14558021, complement)
ID: 100248618
249. LOC100244187
lignin-forming anionic peroxidase-like[Vitis vinifera]
Chromosome: 1
Annotation: Chromosome 1NC_012007.3 (18557540..18570635)
ID: 100244187
250. LOC100854254
peroxidase 25-like[Vitis vinifera]
Chromosome: 11
Annotation: Chromosome 11NC_012017.3 (4636958..4638203, complement)
ID: 100854254
251. LOC100260967
peroxidase 25-like[Vitis vinifera]
Chromosome: 11
Annotation: Chromosome 11NC_012017.3 (4615744..4622358, complement)
ID: 100260967
252. LOC100245996
peroxidase 5-like[Vitis vinifera]
Chromosome: 14
Annotation: Chromosome 14NC_012020.3 (475653..477026, complement)
ID: 100245996
253. LOC100259578
lignin-forming anionic peroxidase-like[Vitis vinifera]
Chromosome: 1
Annotation: Chromosome 1NC_012007.3 (18614743..18615621)
ID: 100259578
254. LOC100250335
peroxidase N1-like[Vitis vinifera]
Chromosome: 12
Annotation: Chromosome 12NC_012018.3 (14579481..14585338, complement)
ID: 100250335
255. LOC100242472
lignin-forming anionic peroxidase-like[Vitis vinifera]
Chromosome: 1
Annotation: Chromosome 1NC_012007.3 (18624884..18625657, complement)
ID: 100242472
256. LOC100855210
peroxidase 5-like[Vitis vinifera]
Chromosome: 1
Annotation: Chromosome 1NC_012007.3 (18536513..18542680)
ID: 100855210
257. LOC100264932
type II peroxiredoxin E[Vitis vinifera]
Other Aliases: GSVIVT00021685001
Chromosome: 8
Annotation: Chromosome 8NC_012014.3 (17991784..17993061)
ID: 100264932
259. LOC100245908
type II peroxiredoxin F[Vitis vinifera]
Other Aliases: GSVIVT00019923001
Chromosome: 5
Annotation: Chromosome 5NC_012011.3 (4540083..4546415)
ID: 100245908
260. LOC100243939
type II peroxiredoxin C[Vitis vinifera]
Other Aliases: GSVIVT00016713001
Chromosome: 11
Annotation: Chromosome 11NC_012017.3 (2964375..2968044)
ID: 100243939
263. LOC100259748
2-Cys peroxiredoxin[Vitis vinifera]
Chromosome: 8
Annotation: Chromosome 8NC_012014.3 (16609632..16615782, complement)
ID: 100259748
266. LOC100240847
thioredoxin-like protein 4B[Vitis vinifera]
Other Aliases: GSVIVT00001260001
Chromosome: 7
Annotation: Chromosome 7NC_012013.3 (9782938..9790467, complement)
ID: 100240847
267. TRX
thioredoxin h[Vitis vinifera]
Other Aliases: GSVIVT00012977001
Chromosome: Un
ID: 100233052
268. LOC100259132
thioredoxin-like protein CDSP32, chloroplastic[Vitis vinifera]
Other Aliases: GSVIVT00015512001
Chromosome: 18
Annotation: Chromosome 18NC_012024.3 (1569194..1570439)
ID: 100259132
269. LOC100254144
thioredoxin-related transmembrane protein 2-like[Vitis vinifera]
Other Aliases: GSVIVT00032413001
Chromosome: 4
Annotation: Chromosome 4NC_012010.3 (2718033..2727384, complement)
ID: 100254144
270. LOC100247612
thioredoxin-like protein Clot[Vitis vinifera]
Other Aliases: GSVIVT00008863001
Chromosome: 13
Annotation: Chromosome 13NC_012019.3 (23302009..23305719, complement)
ID: 100247612
271. LOC100854023
thioredoxin-like protein CDSP32, chloroplastic-like[Vitis vinifera]
Chromosome: 3
Annotation: Chromosome 3NC_012009.3 (2047226..2048292, complement)
ID: 100854023
272. LOC100262307
NADPH-dependent thioredoxin reductase 3-like[Vitis vinifera]
Chromosome: 8
Annotation: Chromosome 8NC_012014.3 (22138513..22148691)
ID: 100262307
273. LOC100253860
thioredoxin-like protein CDSP32, chloroplastic-like[Vitis vinifera]
Chromosome: 3
Annotation: Chromosome 3NC_012009.3 (2042471..2043656, complement)
ID: 100253860
274. LOC100257686
ferredoxin-thioredoxin reductase, variable chain, chloroplastic-like[Vitis vinifera]
Other Aliases: VITISV_024425
Chromosome: 10
Annotation: Chromosome 10NC_012016.3 (18044826..18046258)
ID: 100257686
275. LOC100264353
thioredoxin domain-containing protein 9-like[Vitis vinifera]
Other Aliases: GSVIVT00036903001
Chromosome: 4
Annotation: Chromosome 4NC_012010.3 (18947784..18951053)
ID: 100264353
276. LOC100262780
thioredoxin domain-containing protein 9 homolog-like[Vitis vinifera]
Other Aliases: GSVIVT01037888001
Chromosome: 3
Annotation: Chromosome 3NC_012009.3 (6699345..6705610, complement)
ID: 100262780
277. LOC100245804
ferredoxin-thioredoxin reductase catalytic chain, chloroplastic-like[Vitis vinifera]
Other Aliases: GSVIVT00020811001
Chromosome: 14
Annotation: Chromosome 14NC_012020.3 (28180397..28187032, complement)
ID: 100245804
278. LOC100242528
thioredoxin domain-containing protein 9-like[Vitis vinifera]
Other Aliases: GSVIVT00032895001
Chromosome: 14
Annotation: Chromosome 14NC_012020.3 (11434185..11437264, complement)
ID: 100242528
279. LOC100263578
thioredoxin reductase 2-like[Vitis vinifera]
Chromosome: 4
Annotation: Chromosome 4NC_012010.3 (23600987..23604292, complement)
ID: 100263578
280. LOC100250566
thioredoxin H-type-like[Vitis vinifera]
Other Aliases: GSVIVT00014532001Trxh, Trxh2
Other Designations: thioredoxin h
Chromosome: 18
Annotation: Chromosome 18NC_012024.3 (11297009..11305549, complement)
ID: 100250566
281. LOC100253934
thioredoxin H-type 2-like[Vitis vinifera]
Other Aliases: GSVIVT00036859001Trxh1
Other Designations: thioredoxin h1
Chromosome: 4
Annotation: Chromosome 4NC_012010.3 (19238910..19241455, complement)
ID: 100253934
282. LOC100263807
thioredoxin-like 1-1, chloroplastic[Vitis vinifera]
Other Aliases: GSVIVT00016316001
Chromosome: 17
Annotation: Chromosome 17NC_012023.3 (6914803..6916678, complement)
ID: 100263807
283. LOC100267745
thioredoxin-like 4, chloroplastic[Vitis vinifera]
Other Aliases: GSVIVT00014817001
Chromosome: 18
Annotation: Chromosome 18NC_012024.3 (8851232..8854506, complement)
ID: 100267745
284. LOC100264263
thioredoxin M-type, chloroplastic-like[Vitis vinifera]
Other Aliases: GSVIVT00014312001
Chromosome: 18
Annotation: Chromosome 18NC_012024.3 (13444640..13445912)
ID: 100264263
285. LOC100261132
thioredoxin O1, mitochondrial-like[Vitis vinifera]
Other Aliases: GSVIVT01012130001
Chromosome: 1
Annotation: Chromosome 1NC_012007.3 (1193724..1197413)
ID: 100261132
286. LOC100255487
thioredoxin-like 3-1, chloroplastic[Vitis vinifera]
Other Aliases: GSVIVT00025401001
Chromosome: 8
Annotation: Chromosome 8NC_012014.3 (20382054..20383765)
ID: 100255487
287. LOC100254862
thioredoxin-like protein CITRX, chloroplastic[Vitis vinifera]
Other Aliases: GSVIVT00030903001
Chromosome: 13
Annotation: Chromosome 13NC_012019.3 (19977758..19994533)
ID: 100254862
288. LOC100249310
thioredoxin-like protein 4A[Vitis vinifera]
Other Aliases: GSVIVT00020074001
Chromosome: 5
Annotation: Chromosome 5NC_012011.3 (5938864..5945621)
ID: 100249310
289. LOC100248705
thioredoxin M3, chloroplastic-like[Vitis vinifera]
Other Aliases: GSVIVT00036607001
Chromosome: 3
Annotation: Chromosome 3NC_012009.3 (3866770..3870846, complement)
ID: 100248705
290. LOC100247940
thioredoxin-like 3-2, chloroplastic-like[Vitis vinifera]
Other Aliases: VIT_00016235001
Chromosome: 13
Annotation: Chromosome 13NC_012019.3 (6120577..6127920, complement)
ID: 100247940
291. LOC100245159
thioredoxin Y1, chloroplastic-like[Vitis vinifera]
Other Aliases: GSVIVT00031751001
Chromosome: 18
Annotation: Chromosome 18NC_012024.3 (19593320..19596449, complement)
ID: 100245159
292. LOC100242924
thioredoxin X, chloroplastic-like[Vitis vinifera]
Other Aliases: GSVIVT00007099001
Chromosome: 10
Annotation: Chromosome 10NC_012016.3 (13041818..13049186)
ID: 100242924
293. LOC100855130
thioredoxin O1, mitochondrial-like[Vitis vinifera]
Chromosome: 1
Annotation: Chromosome 1NC_012007.3 (1187499..1191134)
ID: 100855130
294. LOC100268081
TPR repeat-containing thioredoxin TDX-like[Vitis vinifera]
Chromosome: 17
Annotation: Chromosome 17NC_012023.3 (1833039..1853471, complement)
ID: 100268081
295. LOC100267093
thioredoxin H9-like[Vitis vinifera]
Chromosome: 8
Annotation: Chromosome 8NC_012014.3 (10934056..10935465, complement)
ID: 100267093
296. LOC100258388
thioredoxin X, chloroplastic-like[Vitis vinifera]
Chromosome: 10
Annotation: Chromosome 10NC_012016.3 (13314493..13320940)
ID: 100258388
297. LOC100255533
TPR repeat-containing thioredoxin TTL1-like[Vitis vinifera]
Chromosome: 19
Annotation: Chromosome 19NC_012025.3 (1566901..1570258, complement)
ID: 100255533
298. LOC100242128
TPR repeat-containing thioredoxin TTL1-like[Vitis vinifera]
Chromosome: 18
Annotation: Chromosome 18NC_012024.3 (4284177..4287720, complement)
ID: 100242128
299. LOC100265932
thioredoxin-like 3-3-like[Vitis vinifera]
Other Aliases: VIT_00033652001
Chromosome: 8
Annotation: Chromosome 8NC_012014.3 (18916995..18918107)
ID: 100265932
300. LOC100261565
thioredoxin F, chloroplastic-like[Vitis vinifera]
Other Aliases: GSVIVT00025050001
Chromosome: 4
Annotation: Chromosome 4NC_012010.3 (17127763..17132363)
ID: 100261565
301. LOC100257490
thioredoxin-like protein HCF164, chloroplastic-like[Vitis vinifera]
Other Aliases: VIT_00003777001
Chromosome: Un
ID: 100257490
302. LOC100252624
thioredoxin H2-like[Vitis vinifera]
Other Aliases: GSVIVT00020873001
Chromosome: 14
Annotation: Chromosome 14NC_012020.3 (28755821..28756786, complement)
ID: 100252624
303. LOC100248576
thioredoxin-like protein CXXS1[Vitis vinifera]
Other Aliases: GSVIVT00027433001
Chromosome: 19
Annotation: Chromosome 19NC_012025.3 (5398498..5399509)
ID: 100248576
304. LOC100246832
thioredoxin H2-like[Vitis vinifera]
Other Aliases: GSVIVT00028970001
Chromosome: 1
Annotation: Chromosome 1NC_012007.3 (10422536..10423558, complement)
ID: 100246832
305. LOC100245630
thioredoxin-like 2, chloroplastic[Vitis vinifera]
Other Aliases: GSVIVT00016576001
Chromosome: 11
Annotation: Chromosome 11NC_012017.3 (1874968..1881825)
ID: 100245630
306. LOC100245250
thioredoxin M4, chloroplastic-like[Vitis vinifera]
Other Aliases: VIT_00014360001
Chromosome: 19
Annotation: Chromosome 19NC_012025.3 (2987871..3003873)
ID: 100245250
307. LOC100854530
TPR repeat-containing thioredoxin TTL1-like[Vitis vinifera]
Chromosome: Un
ID: 100854530
308. LOC100853908
thioredoxin-like 2, chloroplastic-like[Vitis vinifera]
Chromosome: 9
Annotation: Chromosome 9NC_012015.3 (2164973..2168556)
ID: 100853908
309. LOC100266040
thioredoxin H-type-like[Vitis vinifera]
Chromosome: 18
Annotation: Chromosome 18NC_012024.3 (11293740..11294425, complement)
ID: 100266040
310. LOC100261370
TPR repeat-containing thioredoxin TTL1-like[Vitis vinifera]
Chromosome: 8
Annotation: Chromosome 8NC_012014.3 (15578905..15582285, complement)
ID: 100261370
311. LOC100260578
thioredoxin-like 1-1, chloroplastic-like[Vitis vinifera]
Chromosome: 8
Annotation: Chromosome 8NC_012014.3 (21108441..21110525, complement)
ID: 100260578
312. LOC100252295
thioredoxin M-type, chloroplastic-like[Vitis vinifera]
Chromosome: 12
Annotation: Chromosome 12NC_012018.3 (4693323..4708401)
ID: 100252295
313. LOC100247135
TPR repeat-containing thioredoxin TTL1-like[Vitis vinifera]
Chromosome: 12
Annotation: Chromosome 12NC_012018.3 (3018560..3022589, complement)
ID: 100247135
314. LOC100855095
thioredoxin-like protein 4A-like[Vitis vinifera]
Chromosome: 5
Annotation: Chromosome 5NC_012011.3 (5920946..5921251)
ID: 100855095
315. LOC100266001
TPR repeat-containing thioredoxin TTL1-like[Vitis vinifera]
Chromosome: 18
Annotation: Chromosome 18NC_012024.3 (8220838..8222026, complement)
ID: 100266001
316. LOC100259481
thioredoxin M-type, chloroplastic-like[Vitis vinifera]
Chromosome: 19
Annotation: Chromosome 19NC_012025.3 (20152038..20152848)
ID: 100259481
317. LOC100256850
thioredoxin M4, chloroplastic-like[Vitis vinifera]
Chromosome: Un
ID: 100256850
320. LOC100244727
1-Cys peroxiredoxin 03[Vitis vinifera]
Chromosome: 5
Annotation: Chromosome 5NC_012011.3 (21577..22803, complement)
ID: 100244727
332. LOC100260385
glutaredoxin-C1-like[Vitis vinifera]
Other Aliases: GSVIVT00016050001
Chromosome: 17
Annotation: Chromosome 17NC_012023.3 (9941524..9942644, complement)
ID: 100260385
336. LOC100250698
peroxiredoxin Q[Vitis vinifera]
Other Aliases: GSVIVT00016388001
Chromosome: 11
Annotation: Chromosome 11NC_012017.3 (552917..554831)
ID: 100250698
346. LOC100251012
1-Cys peroxiredoxin-like[Vitis vinifera]
Chromosome: 5
Annotation: Chromosome 5NC_012011.3 (2482821..2483986, complement)
ID: 100251012
357. LOC100254526
putative glutaredoxin-C14-like[Vitis vinifera]
Chromosome: Un
ID: 100254526
358. LOC100252348
peroxiredoxin-2E, chloroplastic-like[Vitis vinifera]
Chromosome: 18
Annotation: Chromosome 18NC_012024.3 (10785207..10785926)
ID: 100252348
